# Supplementary material for: A highly selective and sensitive fluorescent probe based on the chromone fluorophore for imaging hydrogen sulfide in living cells
Source: Royal Society of Chemistry journal article supplement (doi:10.1039/c9nj05386g), 2019-12-26

For New Journal of Chemistry

**A high selective and sensitive fluorescence probe based on chromone fluorophore  
for imaging hydrogen sulfide in living cells**

Fei Hou,<sup>a,b</sup> Li zhu,<sup>b</sup> Hongyi Zhang,<sup>a</sup> Zhen Qiao,<sup>a</sup> Ningning Wei\*<sup>a</sup> and Yanru Zhang\*<sup>a</sup>

<sup>a</sup> Department of Pharmacology and Department of Medicinal Chemistry, Qingdao  
University School of Pharmacy, Qingdao 266021 China

<sup>b</sup> Department of Pharmacy, Affiliated Hospital of Qingdao University, Qingdao,  
Shandong 266003 China

\*corresponding author: [weiningning@qdu.edu.cn](mailto:weiningning@qdu.edu.cn) and [yanru.zhang@qdu.edu.cn](mailto:yanru.zhang@qdu.edu.cn)

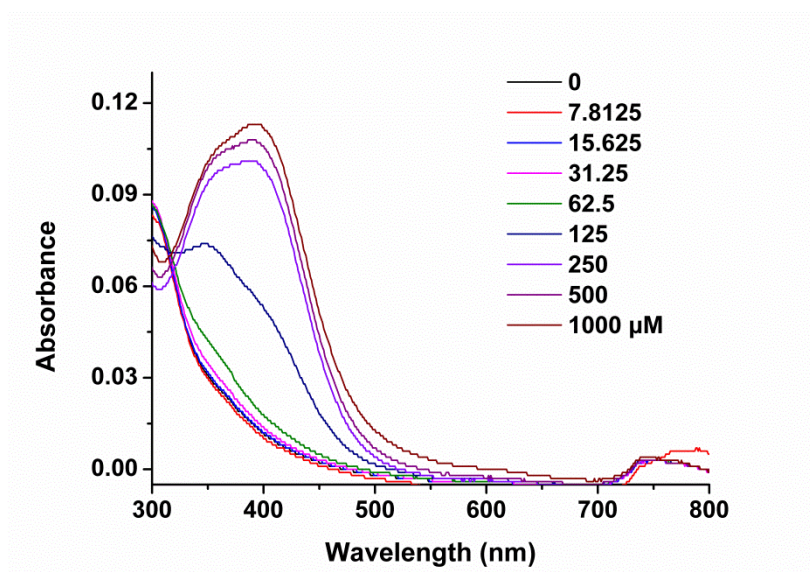

**Fig. S1.** The absorption spectra of BSCN with different concentration of  $\text{Na}_2\text{S}$ .

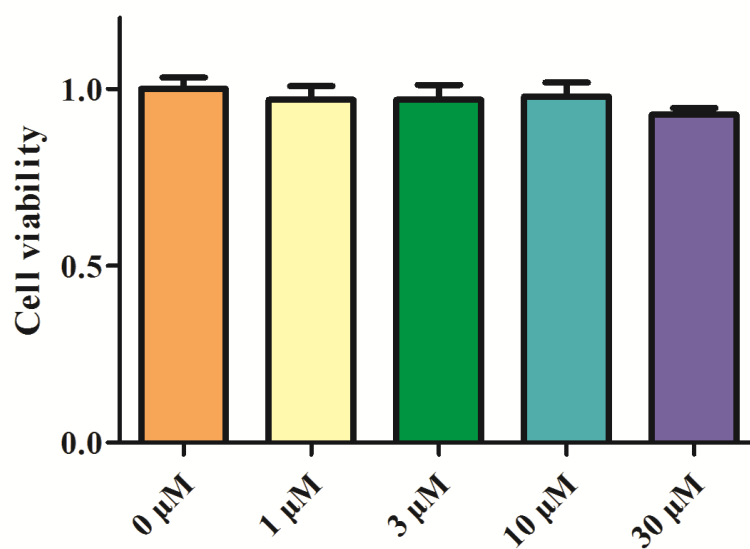

**Fig. S2.** The viability of HeLa cells incubated with BSCN (0, 1, 3, 10, 30  $\mu\text{M}$ ) for 24 h.

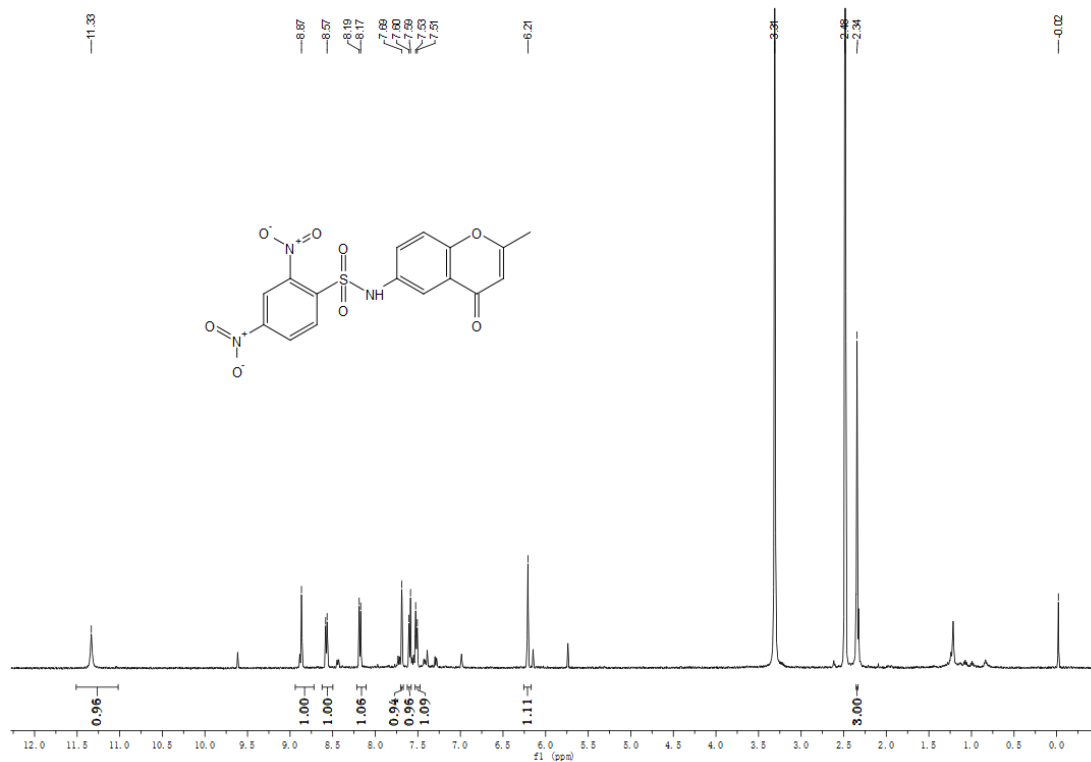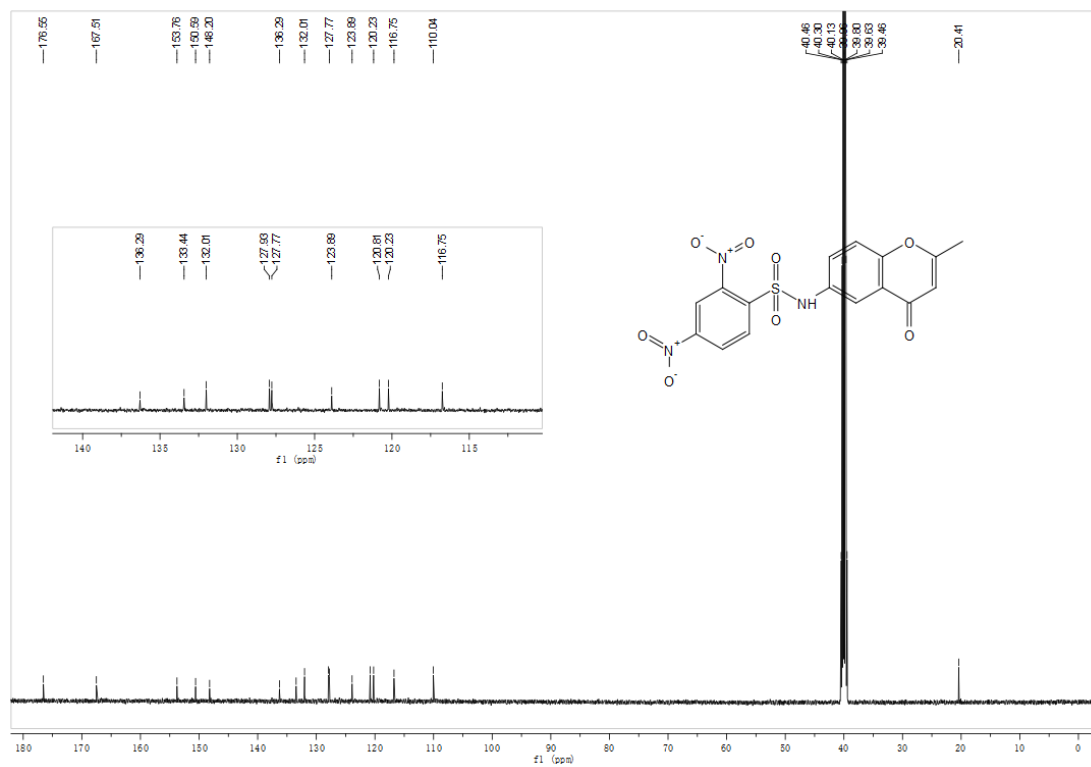

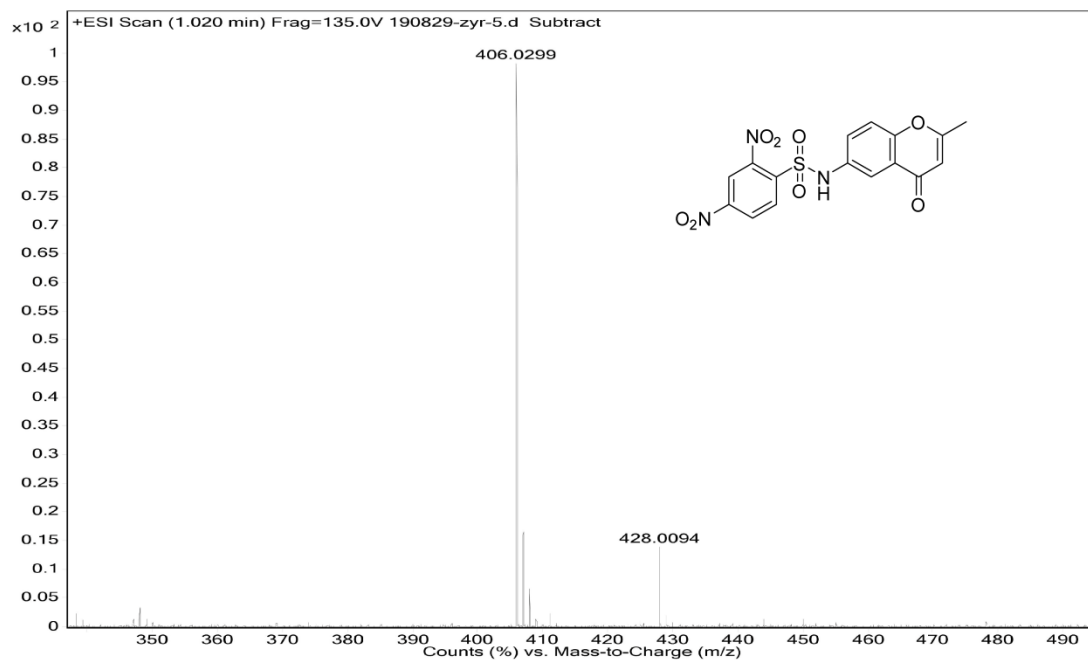

Supplement: c9nj05386g1.pdf [file c9nj05386g1.pdf]
